# Supplementary material for: Dual inhibition of histone deacetylases and phosphoinositide 3-kinase enhances therapeutic activity against B cell lymphoma
Source: PubMed Central journal article supplement (PMC5355158; doi:10.18632/oncotarget.14876), 2017-01-28
Supplement: oncotarget-08-14017-s001.pdf [file oncotarget-08-14017-s001.pdf]

# Dual inhibition of histone deacetylases and phosphoinositide 3-kinase enhances therapeutic activity against B cell lymphoma

## Supplementary Materials

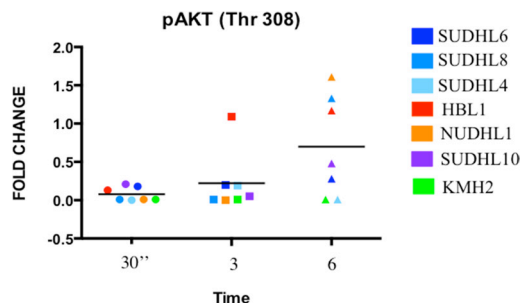

**Supplementary Figure 1:** Scatterplot summarizing the results of phospho AKT (Thr 308) assessed by luminex multiplex assay, showing significant decrease in phosphorylation levels at 30 minutes in our cell line panel ( $n = 7$ ) after treatment with CUDC-907 0.1  $\mu$ M for 24 hours. However, AKT phosphorylation progressively increased in most cells in time dependent manner.

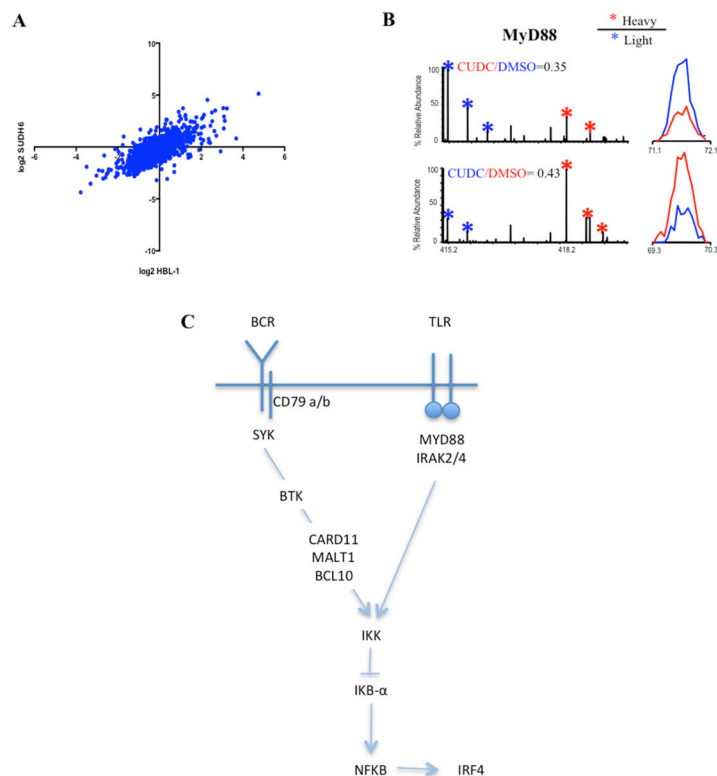

**Supplementary Figure 2:** (A) Scatterplot of quantitative proteomics data showing protein changes in HBL-1 (x axis) and SUDHL-6 cells (y axis) in a log2 scale. Average log2 fold change of forward and reverse experiments of HBL-1 and SUDHL-6 cells were used to generate the scatterplot. (B) Representative MS spectra from MyD88 are shown with forward (top panel) and reverse (lower panel) experiments after treatment with CUDC-907 0.1  $\mu$ M for 24 hours in HBL-1. The selected ion current chromatograms for the (M+2H)<sup>2+</sup> ions from tryptic peptide LLELLTK for the forward and reverse experiments are shown to the right of the associated spectrum. The light isoform ( $m/z = 415.3$ ) is shown in blue and heavy isoform ( $m/z = 418.3$ ) is shown in red. The integrated area under the curve was used to calculate the ratio of the two isoforms. (C) Schematic representation of the B-cell receptor (BCR) and Toll like receptor (TLR) pathways, which converge to activate NF- $\kappa$ B.

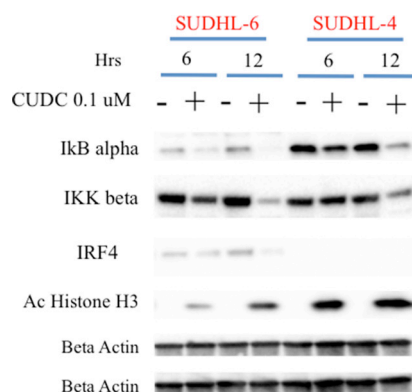

**Supplementary Figure 3: Western blot demonstrating that CUDC-907 (0.1 μM for 6 and 12 hours) inhibits NF-κB activation by increasing IκB alpha levels and decreasing IKK beta levels in two representative GCB DLBCL cell lines (SUDHL-6 and SUDHL-4). The changes were associated with a decrease in IRF4 levels.**

**Supplementary Table 1: Table summarizing the CUDC-907 IC50 dose at 72 hours for all the lymphoma cell lines used**

| Cell line | CUDC-907 IC50 (μM) 72Hrs |
|-----------|--------------------------|
| HDLM2     | 0.6843                   |
| KMH2      | 0.2023                   |
| SUDHL-4   | 0.1224                   |
| L-428     | 0.0919                   |
| BJAB      | 0.0498                   |
| HBL-1     | 0.0394                   |
| DB        | 0.0355                   |
| NUDHL-1   | 0.0262                   |
| SUDHL-10  | 0.0254                   |
| RAMOS     | 0.0243                   |
| RAJI      | 0.0218                   |
| Ri-1      | 0.0182                   |
| U-2932    | 0.0153                   |
| CA-46     | 0.0135                   |
| SUDHL-6   | 0.0119                   |
| OCI-LY-19 | 0.0089                   |
| SUDHL-8   | 0.0087                   |
| TMD-8     | 0.0070                   |
| OCI-LY-10 | 0.0047                   |
| U-2973    | 0.0042                   |

**Supplementary Table 2: Table summarizing the panobinostat and BKM-120 IC50 dose at 48 hours for DLBCL cells**

| Cell line | Panobinostat IC50 ( $\mu$ M) 48 Hrs | BKM-120 IC50 ( $\mu$ M) 48 Hrs |
|-----------|-------------------------------------|--------------------------------|
| HBL-1     | 0.033                               | 0.65                           |
| TMD-8     | 0.085                               | 0.9                            |
| U-2932    | 0.62                                | 1.2                            |
| SUDHL-8   | 0.12                                | 0.5                            |
| SUDHL-6   | 0.05                                | 0.8                            |
| SUDHL-4   | 0.025                               | 1.5                            |
| OCI-LY-19 | 0.01                                | 0.1                            |
| NUDHL-1   | 0.007                               | 0.5                            |
| SUDHL-10  | 0.05                                | 0.8                            |
| U-2973    | 0.40                                | 0.4                            |

**Supplementary Table 3: Proteins that are commonly down or up-regulated following treatment of HBL-1 and SUDHL-6 cells with 0.1  $\mu$ M CUDC-907 for 24 hours. See\_Supplementary\_Table 3**

**Supplementary Table 4: Table summarizing the cell lines used including cell of origin and source**

| Cell line                                | Cell of Origin | Source              |
|------------------------------------------|----------------|---------------------|
| <b>Diffuse Large B cell Lymphoma</b>     |                |                     |
| SUDHL-4                                  | GCB            | DSMZ                |
| SUDHL-6                                  | GCB            | DSMZ                |
| OCI-LY-19                                | GCB            | DSMZ                |
| SUDHL-8                                  | GCB            | ATCC                |
| BJAB                                     | GCB            | MDCC (Davis lab)    |
| U-2932                                   | ABC            | DSMZ                |
| OCI-LY-3                                 | ABC            | DSMZ                |
| Ri-1                                     | ABC            | DSMZ                |
| HBL-1                                    | ABC            | MDCC (Davis lab)    |
| TMD-8                                    | ABC            | MDCC (Davis lab)    |
| OCI-LY-10                                | ABC            | WCMC (Cesarman lab) |
| NUDHL-1                                  | DH             | DSMZ                |
| SUDHL-10                                 | DH             | ATCC                |
| <b>Hodgkin Lymphoma</b>                  |                |                     |
| HDLM2                                    | -              | DSMZ                |
| KMH-2                                    | -              | DSMZ                |
| L-428                                    | -              | DSMZ                |
| <b>Large Cell Lymphoma B-Lymphoblast</b> |                |                     |
| DB                                       | -              | ATCC                |
| <b>Burkitt Lymphoma</b>                  |                |                     |
| RAJI                                     | -              | ATCC                |
| RAMOS                                    | -              | ATCC                |
| CA-46                                    | -              | ATCC                |
